# Supplementary material for: m6A-induced repression of SIAH1 facilitates alternative splicing of androgen receptor variant 7 by regulating CPSF1
Source: PubMed Central journal article supplement — Mol Ther Nucleic Acids. 2022 Mar 15;28:219–30. doi: 10.1016/j.omtn.2022.03.008 (PMC8965770; doi:10.1016/j.omtn.2022.03.008), 2022-03-15
Supplement: mmc1.pdf [file mmc1.pdf]

**OMTN, Volume 28**

**Supplemental information**

**m<sup>6</sup>A-induced repression of SIAH1 facilitates  
alternative splicing of androgen receptor  
variant 7 by regulating CPSF1**

**Lei Xia, Qing Han, Xuehui Duan, Yinjie Zhu, Jiahua Pan, Baijun Dong, Weiliang Xia, Wei Xue, and Jianjun Sha**

**Supplementary Table S1. Sequence of primers, siRNA, and shRNA used in the study**

|                           |                       |                                                                |
|---------------------------|-----------------------|----------------------------------------------------------------|
| shSIAH1 (1)               | sense<br>(5'-3')      | GATCCGCAATTTAGGCATCAATGTAAGCTTACATTGATGC<br>CTAAATTGCTTTTTT    |
|                           | anti-sense<br>(5'-3') | CTAGAAAAAAGCAATTTAGGCATCAATGTAAGCTTACAT<br>TGATGCCTAAATTGCG    |
| shSIAH1#2                 | sense<br>(5'-3')      | GATCCTAATGGACTTATGCTGATGCAGCTGCATCAGCATA<br>AGTCCATTATTTTTT    |
|                           | anti-sense<br>(5'-3') | CTAGAAAAAATAATGGACTTATGCTGATGCTGCATCAGC<br>ATAAGTCCATTAG       |
| shAR-v7 (2)               | Sense<br>(5'-3')      | CCGGAAGGCTAATGAGGTTTATTTTCTCGAGAAAATAAA<br>CCTCATTAGCCTTTTTTTG |
|                           | anti-sense<br>(5'-3') | AATTCAAAAAAGGCTAATGAGGTTTATTTTCTCGAGAA<br>AATAAACCTCATTAGCCTT  |
| CPSF1 siRNA-1             | CCAGATGATCAGCGTCAAGAA |                                                                |
| CPSF1 siRNA-2             | AGGGCGGATCTTGATCATGGA |                                                                |
| Alkbh5 siRNA-1            | ACAAGTACTTCTTCGGCGA   |                                                                |
| Alkbh5 siRNA-2            | GCGCCGTCATCAACGACTA   |                                                                |
| siRNA control<br>(siCont) | TTCTCCGAACGTGTCACGA   |                                                                |
| qPCR for SIAH1            | sense                 | TACTCCACCTTCTCTGTACTCCTG                                       |
|                           | anti-sense            | CTCATTCTTTTCTCTTCCTTGTC                                        |
| qPCR for CPSF1            | sense                 | TACCTGTTCTGGGTCTCG                                             |
|                           | anti-sense            | CGCATCCACTCGTCTTCT                                             |
| qPCR for AR-FL            | sense                 | CAGTGGATGGGCTGAAAAAT                                           |
|                           | anti-sense            | GGAGCTTGGTGAGCTGGTAG                                           |
| qPCR for AR-v7            | sense                 | GCAATTGCAAGCATCTCAA                                            |
|                           | anti-sense            | CAACCCCAACGTCAAAGTCT                                           |
| qPCR for Alkbh5           | sense                 | TGTCCGTGTCCTTCTTTAGCG                                          |
|                           | anti-sense            | GCCGTATGCAGTGAGTGATTC                                          |
| qPCR for Mettl3           | sense                 | GCAGGCTCAACATACCCGTA                                           |
|                           | anti-sense            | AGACATTCTCTCCCAACTCCAT                                         |
| qPCR for Mettl14          | sense                 | TTGCAGCACCTCGATCATTAT                                          |
|                           | anti-sense            | CTTAGTCTTCCCAGGATTGTTTTA                                       |
| qPCR for WTAP             | sense                 | GGAAAACATCCTTGTAATGCGAC                                        |
|                           | anti-sense            | GCTGGACTTGCTTGAGGTA                                            |
| qPCR for FTO              | sense                 | GCTGTGCCATTGTGTATGTCTG                                         |
|                           | anti-sense            | ATGTCCAATCATCTTGTCCGT                                          |
| qPCR for nup210           | sense                 | AAGGAGAAGTCTTTTGGGTGGC                                         |
|                           | anti-sense            | GCTGGAGAAGGTCAGGGTAGTG                                         |
| qPCR for slc3a2           | sense                 | GGGGACTAACTCCTCCGACCT                                          |
|                           | anti-sense            | GGAGCCTTGCTGAGACAACT                                           |
| qPCR for $\beta$ -actin   | sense                 | CTGGAACGGTGAAGGTGACA                                           |

|  |            |                         |
|--|------------|-------------------------|
|  | anti-sense | AAGGGACTTCCTGTAACAATGCA |
|--|------------|-------------------------|

1. Ko HR, Jin EJ, Lee SB, et al.: SIAH1 ubiquitin ligase mediates ubiquitination and degradation of Akt3 in neural development. *The Journal of biological chemistry* 294: 15435-15445, 2019.
2. Fan L, Zhang F, Xu S, et al.: Histone demethylase JMJD1A promotes alternative splicing of AR variant 7 (AR-V7) in prostate cancer cells. *Proceedings of the National Academy of Sciences of the United States of America* 115: E4584-E4593, 2018.

**Table S2. Genes encoding RBP and splicing factors selected by gene ontology terms in AmiGO**

**Table S3. Splicing factors concurrently dysregulated in PCa in these datasets**

---

| GSE54460 | GSE6919 | RBP  | GSE3325 | diff | GeneSymbol   |
|----------|---------|------|---------|------|--------------|
| TRUE     | TRUE    | TRUE | TRUE    | up   | CPSF1,PABPC1 |
| FALSE    | TRUE    | TRUE | TRUE    | down | MBNL2;LGALS3 |

---

**Figure S1. Overexpression and knockdown of SIAH1, respectively.**

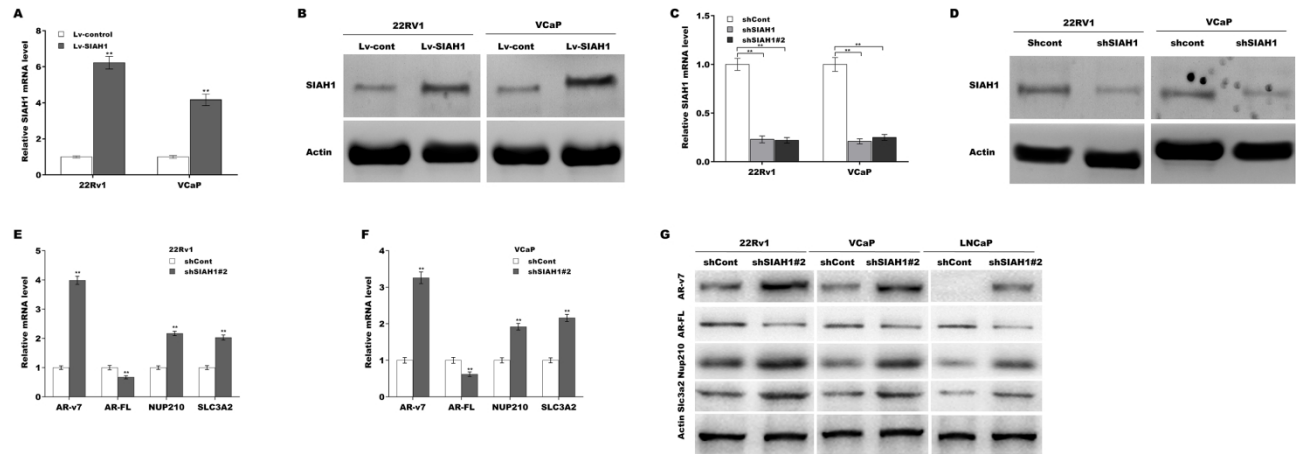

(A) qPCR assays of SIAH1 expression in 22Rv1 and VCaP cells after SIAH1 overexpression. (B) Western Blot analysis for SIAH1 expression in 22Rv1 and VCaP cells after SIAH1 overexpression. qPCR (C) and western blot (D) assays of SIAH1 expression in 22Rv1 and VCaP cells after treatment with shSIAH1 or shSIAH1#2. qPCR assays of AR-v7, AR-FL, Nup210, and Slc3a2 expression in 22Rv1 (E) and VCaP (F) cells after treatment with shSIAH1#2. (G) Western blot assays of AR-v7, AR-FL, Nup210, and Slc3a2 expression in 22Rv1, VCaP, and LNCaP cells after treatment with shSIAH1#2.  $**p < 0.01$ .

**Figure S2. SIAH1 regulates CPSF1 protein stability.**

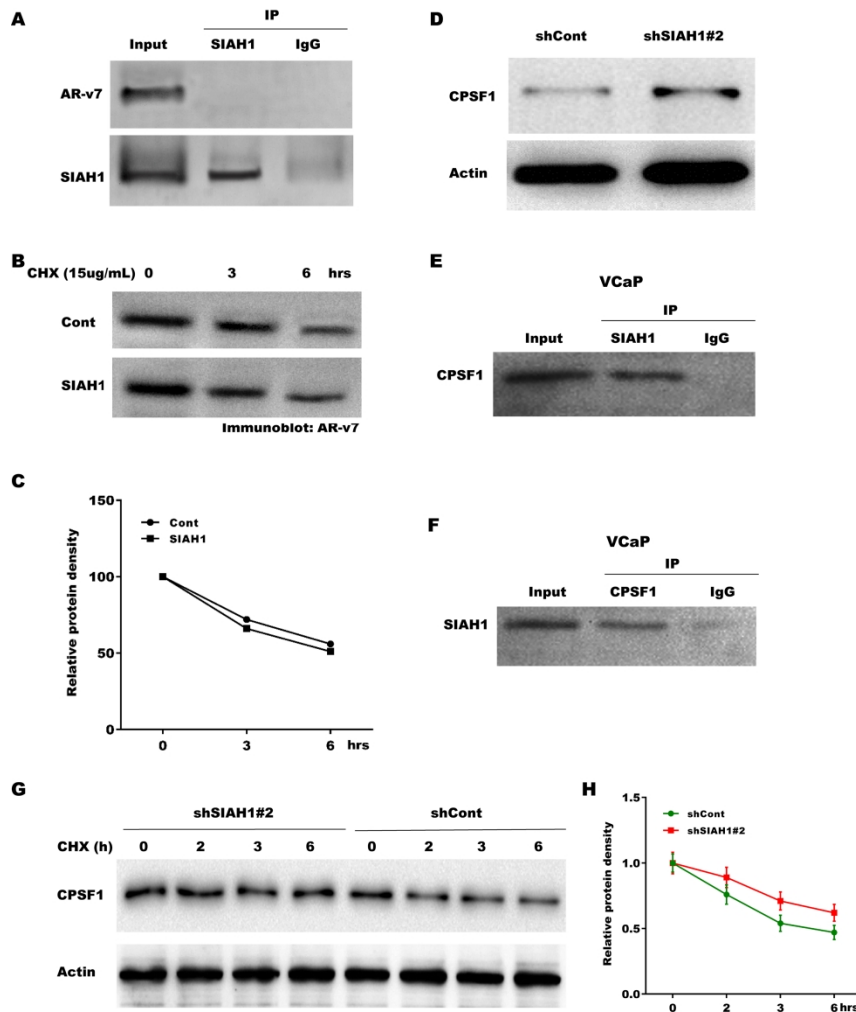

(A) The interaction between SIAH1 and AR-v7 in 22Rv1 cells was determined by Co-IP assay. (B and C) The effect of SIAH1 on the stability of AR-v7 in SIAH1 overexpressed 22Rv1 cells was determined by cycloheximide chase assay. (D) Western blot assays of CPSF1 expression in LNCaP cells after treatment with shSIAH1#2. (E and F) The interaction between SIAH1 and CPSF1 in VCaP cells was determined by reciprocal Co-IP assay. (G and H) The protein level of CPSF1 was assessed by CHX pulse-chase assay in the presence or absence of shSIAH1#2. CHX (50  $\mu$ g/ml) was used for inhibiting the *de novo* protein synthesis and then relative protein density of CPSF1 was assessed at different time points (0, 2, 3, and 6 h).

**Figure S3. Alkbh5 regulates SIAH1 expression.**

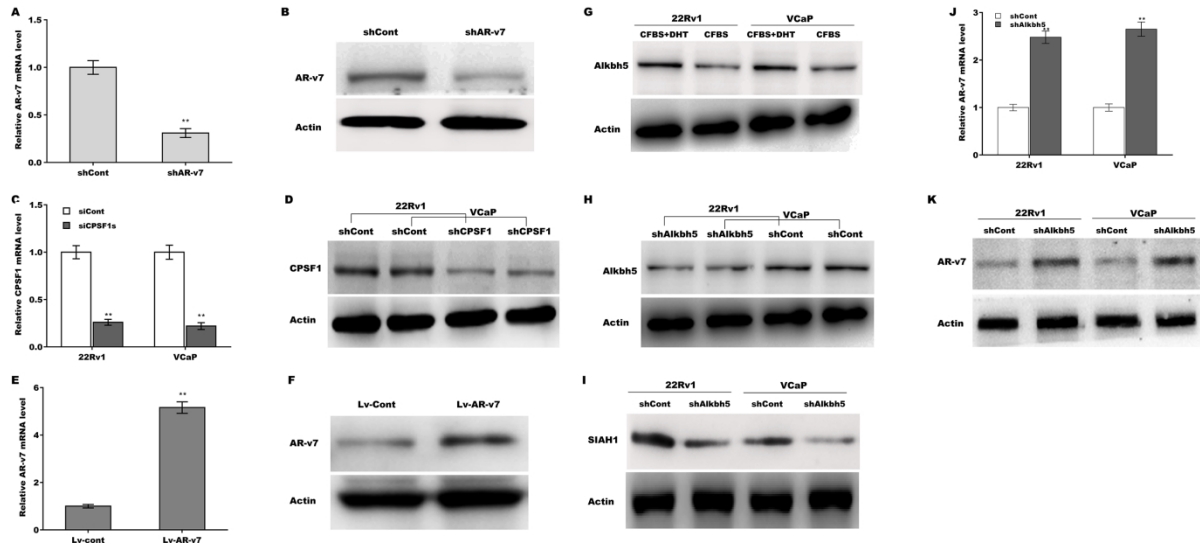

qPCR (A) and western blot (B) analysis of AR-v7 expression in 22Rv1 cells after shAR-v7 treatment. qPCR (C) and Western blot (D) analysis of CPSF1 expression in 22Rv1 and VCaP cells after siCPSF1s treatment. qPCR (E) and Western blot (F) analysis of AR-v7 expression in 22Rv1 cells after Lv-AR-v7 treatment. (G) Western blot analysis of Alkbh5 expression in 22Rv1 and VCaP cells under androgen deprivation. (H) Western blot analysis of Alkbh5 expression in 22Rv1 and VCaP cells after siAlkbh5 treatment. (I) Western blot analysis of SIAH1 expression in 22Rv1 and VCaP cells after Alkbh5 knockdown. qPCR (J) and western blot (K) analysis of AR-v7 expression in 22Rv1 and VCaP cells after Alkbh5 knockdown. \*\* $p < 0.01$ .



**Figure S4. SIAH1 knockdown increased AR-v7 expression in a CPSF1-dependent manner.**

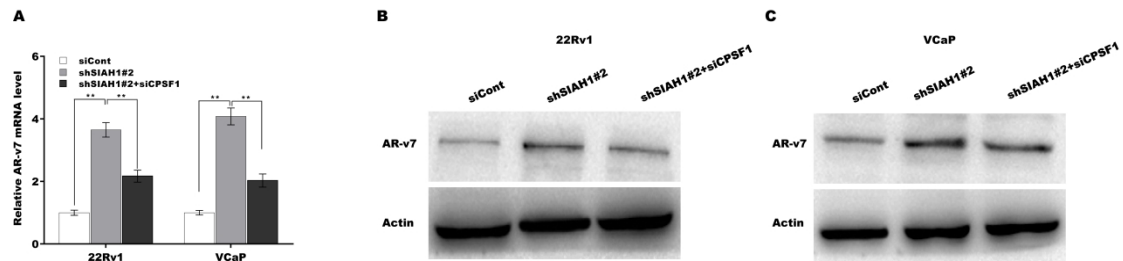

qPCR (A) and western blot (B and C) analysis of AR-v7 expression in 22Rv1 and VCaP cells after treatment with shSIAH1#2 in the presence or absence of siCPSF1.  $**p < 0.01$ .

**Figure S5. SIAH1 regulates AR-v9 expression.**

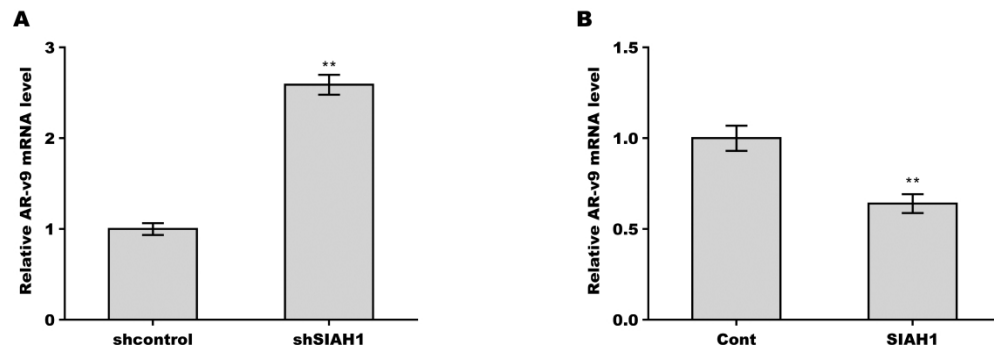

qPCR analysis of AR-v9 expression in 22Rv1 cells after SIAH1 knockdown (A) or overexpression (B). \*\* $p < 0.01$ .
